# Supplementary material for: Enhanced ORR performance to electrochemical lignin valorization in a mixture of ionic liquid/organic solvent binary electrolytes
Source: Royal Society of Chemistry journal article supplement (doi:10.1039/d3nj03967f), 2023-01-01
Supplement: d3nj03967f1.pdf [file d3nj03967f1.pdf]

## Supporting Information

### **Enhanced ORR Performance to Electrochemical Lignin Valorization in a Mixture Ionic Liquid/ Organic Solvent Binary Electrolyte**

Haomin Jiang<sup>a,b</sup>, Ang Li<sup>a</sup>, Yanzhi Sun<sup>a</sup>, Lei Wang<sup>c</sup>, Yongmei Chen<sup>\*a</sup>

<sup>a</sup> Institute of Applied Electrochemistry, College of Chemistry, Beijing University of Chemical Technology, Beijing 100029, China

<sup>b</sup> Center for Advanced Materials Research, Beijing Normal University, Zhuhai 519087, China

<sup>c</sup> Center for Advanced Materials Research, College of Materials and Chemical Engineering, Zhongyuan University of Technology, Zhengzhou 450007, China

\*Corresponding Author: Prof. Yongmei Chen

#### **Corresponding Author**

\*Corresponding author: Prof. Yongmei Chen

\*E-mail: [chenym@buct.edu.cn](mailto:chenym@buct.edu.cn)

## 1. Calculation of viscosity coefficients for [BMIM]BF<sub>4</sub> electrolytes

**Table S1** Values of diffusion coefficient D of Fc and dynamic viscosity  $\eta$  of various electrolytes

| Electrolytes               | D (cm <sup>2</sup> s <sup>-1</sup> ) | $\eta$ (mPa s) |
|----------------------------|--------------------------------------|----------------|
| 100% [BMIM]BF <sub>4</sub> | 2.6661×10 <sup>-7</sup>              | 104.96         |
| 70% [BMIM]BF <sub>4</sub>  | 1.2864×10 <sup>-6</sup>              | 21.75          |
| 60% [BMIM]BF <sub>4</sub>  | 3.0153×10 <sup>-6</sup>              | 9.28           |
| 40% [BMIM]BF <sub>4</sub>  | 7.9970×10 <sup>-6</sup>              | 3.50           |
| Acetonitrile               | -                                    | 0.30           |

## 2. MD results of O<sub>2</sub> adsorption energy various electrolytes

**Table S2.** The corresponding energy of O<sub>2</sub> in various electrolytes.

| Electrolytes                              | $E_{\text{total}}$<br>(kJ mol <sup>-1</sup> ) | $E_e$<br>(kJ mol <sup>-1</sup> ) | $E_{\text{O}_2}$<br>(kJ mol <sup>-1</sup> ) | $E_{e-\text{O}_2}$<br>(kJ mol <sup>-1</sup> ) |
|-------------------------------------------|-----------------------------------------------|----------------------------------|---------------------------------------------|-----------------------------------------------|
| [BMIM]BF <sub>4</sub>                     | -6794.39                                      | -6778.35                         | 1.57                                        | -17.61                                        |
| [BMIM]BF <sub>4</sub> /CH <sub>3</sub> CN | -7410.20                                      | -7390.43                         | 1.16                                        | -20.93                                        |
| CH <sub>3</sub> CN                        | -2172.69                                      | -2160.13                         | 3.53                                        | -16.10                                        |

### 3. Standard curve of products after PBP electrolysis by HPLC

Prepared standard solutions of products with different concentrations to draw the standard curves (as shown in Figure S1). Retention times of benzyl alcohol is 5.8, 1,4-benzoquinone is 6.4 min, benzaldehyde is 7.0 min, and PBP is 8.0 min. It confirms that these two products have good separation effect in electrolytes.

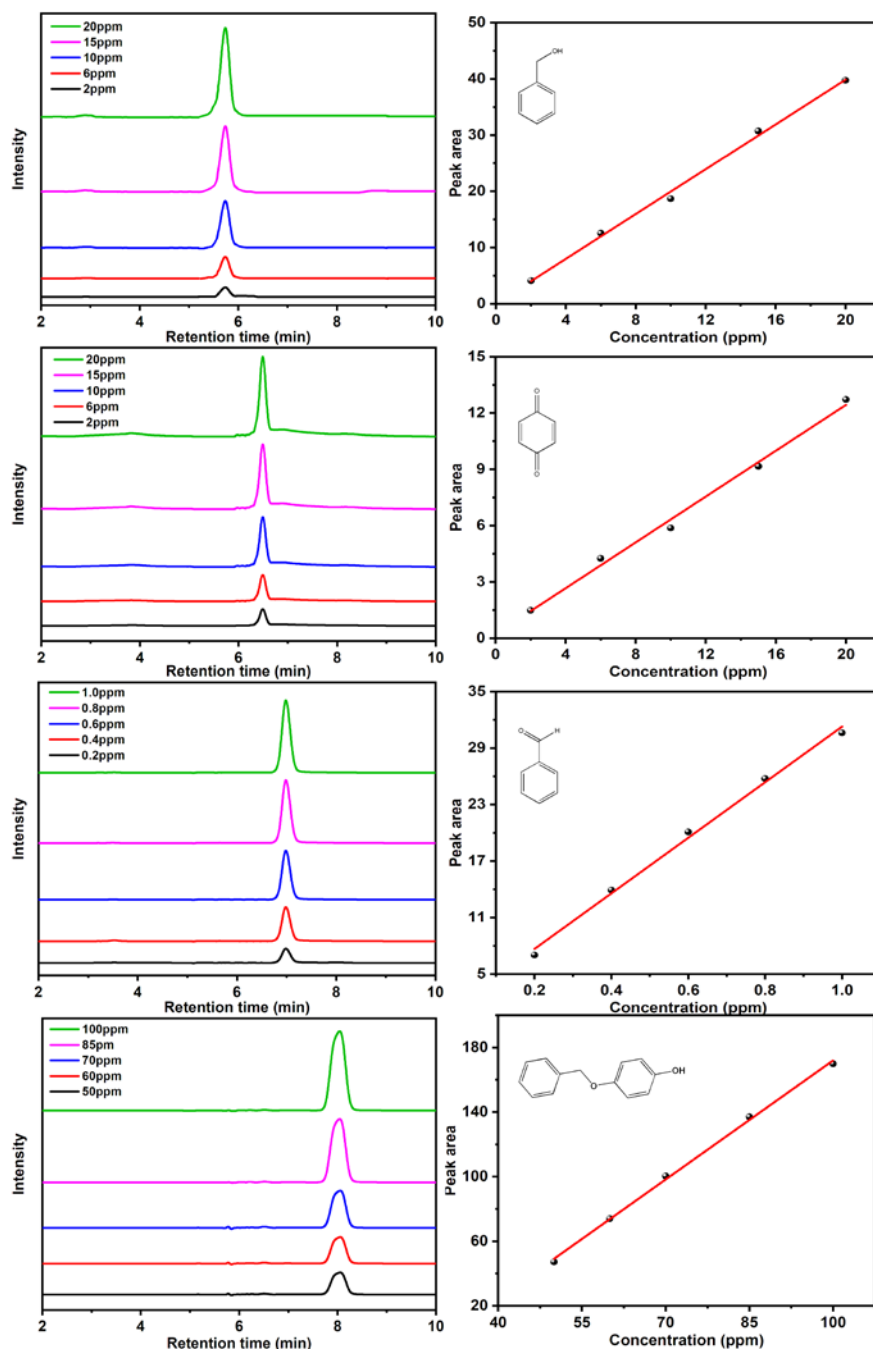

**Figure S1.** The HPLC chromatography and standard curves of various reference materials at different concentrations.

#### 4. The electrical conductivity of different electrolyte systems.

**Table S3.** The electrical conductivity of different electrolytes.

| Electrolytes                                    | Conductivity ( $\sigma$ , mS·cm <sup>-1</sup> ) |
|-------------------------------------------------|-------------------------------------------------|
| [BMIM]BF <sub>4</sub>                           | 10.43                                           |
| [BMIM]BF <sub>4</sub> /CH <sub>3</sub> CN (7:3) | 44.55                                           |
| [BMIM]BF <sub>4</sub> /CH <sub>3</sub> CN (4:6) | 48.81                                           |
| [BMIM]BF <sub>4</sub> /CH <sub>3</sub> CN (1:9) | 7.85                                            |
